# Supplementary material
Source: PubMed Central journal article supplement (PMC5140714)
Supplement: NIHMS822598-supplement-2.pdf [file NIHMS822598-supplement-2.pdf]

**Supplementary Table 1.** Oligonucleotide sequences used in the study. Sequence 5' to 3'

|        |                                             |
|--------|---------------------------------------------|
| 1      | TTAGGGTTAGGGTTAGGG                          |
| 2      | GGTTAGGGTTAGGGTTAG                          |
| 3 (3R) | TGGCGACGGCAGCGAGGCTTAGGGTTAGGGTTAGGG        |
| 4      | TGGCGACGGCAGCGAGGCTTAGGGTTAGGGTTAGGGo       |
| 5      | TGGCGACGGCAGCGAGGCTTAGGGTTAGGGTTAGGoG       |
| 6 (4R) | TGGCGACGGCAGCGAGGCTTAGGGTTAGGGTTAGGGTTAGGG  |
| 7      | TGGCGACGGCAGCGAGGCTTAGGGTTAGGGTTAGGGTTAGGGo |
| 8      | TGGCGACGGCAGCGAGGCTTAGGGTTAGGGTTAGGGTTAGGoG |
| 9      | TGGCGACGGCAGCGAGGCTTAGGGTTAGGGTTAGGGGo      |
| 10     | TGGCGACGGCAGCGAGGCTTAGGGTTAGGGTTAGGGTGo     |
| 11     | TGGCGACGGCAGCGAGGCTTAGGGTTAGGoGTTAGGGTTAGGG |
| 12     | GCCTCGCTGCCGTCGCCA-biotin                   |

Go denotes 8-oxoG substitution
